# Supplementary material for: A novel disease-modifying osteoarthritis drug candidate targeting Runx1
Source: HighWire-hosted journal article supplement (doi:10.1136/annrheumdis-2012-201745), 2012-10-06
Supplement: annrheumdis-2012-201745supp4.pdf [file annrheumdis-2012-201745supp4.pdf]

| Category      | Term                                                              | Count | %           | PValue      | Genes              | List Total | Pop Hits | Pop Total | Fold Enrichment | Bonferroni  | Benjamini   | FDR         |
|---------------|-------------------------------------------------------------------|-------|-------------|-------------|--------------------|------------|----------|-----------|-----------------|-------------|-------------|-------------|
| GOTERM_BP_ALL | GO:0007275 multicellular organismal development                   | 59    | 20.13651877 | 2.45E-05    | 95794, 2684993, 1  | 196        | 2521     | 14219     | 1.697821969     | 0.032690628 | 0.032690628 | 0.040194534 |
| GOTERM_BP_ALL | GO:0002262 cell-cell adhesion                                     | 22    | 7.508532423 | 3.03E-05    | 1276109, 96612, 1  | 196        | 561      | 14219     | 2.032417978     | 0.032690628 | 0.032690628 | 0.040194534 |
| GOTERM_BP_ALL | GO:0048856 anatomical structure development                       | 52    | 17.74744027 | 5.27E-05    | 95794, 2684993, 1  | 196        | 2170     | 14219     | 1.738427527     | 0.068983819 | 0.01771094  | 0.086421572 |
| GOTERM_BP_ALL | GO:0032502 developmental process                                  | 61    | 20.81911263 | 7.67E-05    | 95794, 2684993, 1  | 196        | 2743     | 14219     | 1.613309671     | 0.098870213 | 0.020605932 | 0.125845012 |
| GOTERM_BP_ALL | GO:0045731 system development                                     | 47    | 16.04955634 | 3.12E-04    | 95794, 1276109, 2  | 196        | 2027     | 14219     | 1.682120465     | 0.344799098 | 0.068042272 | 0.510120012 |
| GOTERM_BP_ALL | GO:0051239 regulation of multicellular organismal process         | 23    | 7.849829352 | 0.001015354 | 99852, 1341171, 1  | 196        | 778      | 14219     | 2.144673679     | 0.74805283  | 0.17854915  | 1.653621108 |
| GOTERM_BP_ALL | GO:0022603 regulation of anatomical structure morphogenesis       | 10    | 3.412969283 | 0.00107632  | 99852, 1341171, 1  | 196        | 187      | 14219     | 3.879460875     | 0.77736166  | 0.171373916 | 1.802626556 |
| GOTERM_BP_ALL | GO:0022008 neurogenesis                                           | 18    | 6.14334471  | 0.00117271  | 99852, 95411, 108  | 196        | 537      | 14219     | 2.431706761     | 0.796546259 | 0.162156599 | 1.907600995 |
| GOTERM_BP_ALL | GO:0007359 nervous system development                             | 24    | 8.19112628  | 0.001407189 | 99852, 95411, 108  | 196        | 109      | 14219     | 4.658912189     | 0.3948707   | 0.313828429 | 6.178715007 |
| GOTERM_BP_ALL | GO:0040011 locomotion                                             | 14    | 4.778156997 | 0.001558483 | 96603, 2447164, 9  | 196        | 364      | 14219     | 2.79022763      | 0.879548829 | 0.1750315   | 2.527591727 |
| GOTERM_BP_ALL | GO:0050767 regulation of neurogenesis                             | 8     | 2.730375427 | 0.002282564 | 97173, 1343327, 1  | 196        | 132      | 14219     | 4.396722325     | 0.954994915 | 0.227725315 | 3.681401585 |
| GOTERM_BP_ALL | GO:0048699 generation of neurons                                  | 16    | 5.460750853 | 0.003566682 | 99852, 108077, 24  | 196        | 497      | 14219     | 2.335482281     | 0.992160689 | 0.311315697 | 5.696139791 |
| GOTERM_BP_ALL | GO:0006935 chemotaxis                                             | 7     | 2.389076498 | 0.003878061 | 189010, 1354178    | 196        | 109      | 14219     | 4.658912189     | 0.3948707   | 0.313828429 | 6.178715007 |
| GOTERM_BP_ALL | GO:0007610 behavior                                               | 14    | 4.778156997 | 0.003936626 | 99852, 2447164, 9  | 196        | 405      | 14219     | 2.507760141     | 0.999263911 | 0.300112893 | 6.269183421 |
| GOTERM_BP_ALL | GO:0051960 regulation of nervous system development               | 8     | 2.730375427 | 0.004312377 | 97173, 1343327, 1  | 196        | 148      | 14219     | 3.921400983     | 0.997161697 | 0.306867652 | 6.847874415 |
| GOTERM_BP_ALL | GO:0002783 regulation of developmental process                    | 17    | 5.802047782 | 0.005140284 | 99852, 1341171, 1  | 196        | 568      | 14219     | 2.171268064     | 0.999026039 | 0.337260874 | 8.111100654 |
| GOTERM_BP_ALL | GO:0016337 cell-cell adhesion                                     | 10    | 3.412969283 | 0.005317855 | 1276109, 189010, 1 | 196        | 236      | 14219     | 3.073976592     | 0.999279515 | 0.31003848  | 6.378946643 |
| GOTERM_BP_ALL | GO:0060284 regulation of cell development                         | 8     | 2.730375427 | 0.006348695 | 97173, 1343327, 1  | 196        | 159      | 14219     | 3.6501091       | 0.99882358  | 0.36547332  | 9.926075539 |
| GOTERM_BP_ALL | GO:0048513 organ development                                      | 35    | 11.94539249 | 0.010986438 | 95794, 1276109, 2  | 196        | 1663     | 14219     | 1.526823297     | 0.999999991 | 0.527423135 | 16.58390839 |
| GOTERM_BP_ALL | GO:0006925 cell motion                                            | 12    | 4.09556314  | 0.012544641 | 189010, 102794, 1  | 196        | 367      | 14219     | 2.370273625     | 0.999999994 | 0.557692807 | 17.15036661 |
| GOTERM_BP_ALL | GO:0045664 regulation of neuron differentiation                   | 6     | 2.047181597 | 0.013151595 | 1343327, 189010, 1 | 196        | 102      | 14219     | 4.237406983     | 0.999999994 | 0.558068529 | 18.53100384 |
| GOTERM_BP_ALL | GO:0030154 cell differentiation                                   | 33    | 11.26279863 | 0.014062622 | 2684993, 1341163   | 196        | 1569     | 14219     | 1.525822375     | 0.999999995 | 0.566378746 | 20.74199663 |
| GOTERM_BP_ALL | GO:0009605 response to external stimulus                          | 17    | 5.802047782 | 0.015063839 | 99852, 88225, 106  | 196        | 640      | 14219     | 1.927000957     | 0.999999999 | 0.576081859 | 22.0528068  |
| GOTERM_BP_ALL | GO:0022405 cell cycle phase                                       | 11    | 3.754266212 | 0.015206684 | 138453, 2448480    | 196        | 328      | 14219     | 2.432942384     | 0.999999999 | 0.584717106 | 22.2381547  |
| GOTERM_BP_ALL | GO:00128993 cell motility                                         | 10    | 3.412969283 | 0.01565197  | 102794, 95285, 30  | 196        | 284      | 14219     | 2.554433745     | 0.999999999 | 0.61003848  | 23.98309658 |
| GOTERM_BP_ALL | GO:0051674 localization of cell                                   | 10    | 3.412969283 | 0.01656737  | 102794, 95285, 30  | 196        | 284      | 14219     | 2.554433745     | 0.999999999 | 0.61003848  | 23.98309658 |
| GOTERM_BP_ALL | GO:0007626 locomotory behavior                                    | 9     | 3.071672355 | 0.017331197 | 189010, 1354178    | 196        | 239      | 14219     | 2.771854667     | 0.999999999 | 0.584717106 | 22.2381547  |
| GOTERM_BP_ALL | GO:0045595 regulation of cell differentiation                     | 12    | 4.09556314  | 0.017533505 | 99852, 97173, 134  | 196        | 386      | 14219     | 2.255313524     | 0.999999999 | 0.575689187 | 25.1998877  |
| GOTERM_BP_ALL | GO:0050900 leukocyte migration                                    | 4     | 1.365187713 | 0.020970625 | 95500, 192837, 1   | 196        | 43       | 14219     | 2.215142546     | 0.999999999 | 0.58193168  | 23.98309658 |
| GOTERM_BP_ALL | GO:0007129 synapsis                                               | 3     | 1.023890785 | 0.022227993 | 138453, 2448480    | 196        | 17       | 14219     | 12.80222089     | 0.999999999 | 0.626183224 | 30.85508077 |
| GOTERM_BP_ALL | GO:0070192 chromosome organization involved in meiosis            | 3     | 1.023890785 | 0.022227993 | 138453, 2448480    | 196        | 17       | 14219     | 12.80222089     | 0.999999999 | 0.626183224 | 30.85508077 |
| GOTERM_BP_ALL | GO:0036912 regulation of angiogenesis                             | 4     | 1.365187713 | 0.02343662  | 2684993, 1341163   | 196        | 47       | 14219     | 4.644523077     | 0.999999999 | 0.631613461 | 33.88074239 |
| GOTERM_BP_ALL | GO:0048699 cellular developmental process                         | 33    | 11.26279863 | 0.024234662 | 2684993, 1341163   | 196        | 1636     | 14219     | 1.463334539     | 0.999999999 | 0.635355743 | 33.14782834 |
| GOTERM_BP_ALL | GO:0016043 cellular component organization                        | 37    | 12.6279863  | 0.024710331 | 96612, 95794, 134  | 196        | 1891     | 14219     | 1.413400603     | 0.999999999 | 0.631613461 | 33.88074239 |
| GOTERM_BP_ALL | GO:0010975 regulation of neuron projection development            | 4     | 1.365187713 | 0.026483748 | 1343327, 189010, 1 | 196        | 47       | 14219     | 6.174120712     | 0.999999999 | 0.646776618 | 35.63263038 |
| GOTERM_BP_ALL | GO:0055091 phospholipid homeostasis                               | 2     | 0.692533857 | 0.027240985 | 1353627, 107448    | 196        | 2        | 14219     | 72.5491837      | 0.999999999 | 0.649498225 | 36.44953468 |
| GOTERM_BP_ALL | GO:0051094 positive regulation of developmental process           | 8     | 2.730375427 | 0.028246985 | 99852, 1341171, 1  | 196        | 214      | 14219     | 2.711996948     | 0.999999999 | 0.650373693 | 37.51973082 |
| GOTERM_BP_ALL | GO:0010769 regulation of cell morphogenesis involved in differenc | 4     | 1.365187713 | 0.031077949 | 1343327, 189010, 1 | 196        | 50       | 14219     | 5.803673469     | 0.999999999 | 0.676132581 | 40.44126502 |
| GOTERM_BP_ALL | GO:0006959 humoral immune response                                | 3     | 1.023890785 | 0.037810027 | 88225, 2685651, 1  | 196        | 54       | 14219     | 9.373771731     | 0.999999999 | 0.738445251 | 46.88175079 |
| GOTERM_BP_ALL | GO:0002797 M phase                                                | 9     | 3.071672355 | 0.04152731  | 138453, 108067, 1  | 196        | 283      | 14219     | 2.307114012     | 0.999999999 | 0.762368539 | 50.13923627 |
| GOTERM_BP_ALL | GO:0051716 cellular response to stimulus                          | 14    | 4.778156997 | 0.042371673 | 1920555, 1341850   | 196        | 556      | 14219     | 1.826695786     | 0.999999999 | 0.76549126  | 51.28687598 |
| GOTERM_BP_ALL | GO:0031344 regulation of cell projection organization             | 4     | 1.365187713 | 0.043307147 | 1343327, 189010, 1 | 196        | 57       | 14219     | 5.09094164      | 0.999999999 | 0.780591627 | 51.64950527 |
| GOTERM_BP_ALL | GO:0022604 regulation of cell morphogenesis                       | 5     | 1.706484642 | 0.044390314 | 1343327, 189010, 1 | 196        | 97       | 14219     | 3.734903828     | 0.999999999 | 0.761388909 | 52.40240703 |
| GOTERM_BP_ALL | GO:0030182 neuron differentiation                                 | 11    | 3.754266212 | 0.046812499 | 99852, 96198, 134  | 196        | 399      | 14219     | 2.000012767     | 0.999999999 | 0.786345335 | 56.01922094 |
| GOTERM_BP_ALL | GO:0060326 cell chemotaxis                                        | 3     | 1.023890785 | 0.052486078 | 95500, 192837, 1   | 196        | 27       | 14219     | 8.006657596     | 0.999999999 | 0.802245009 | 58.72597745 |
| GOTERM_BP_ALL | GO:0030595 leukocyte chemotaxis                                   | 3     | 1.023890785 | 0.052486078 | 95500, 192837, 1   | 196        | 27       | 14219     | 8.006657596     | 0.999999999 | 0.802245009 | 58.72597745 |
| GOTERM_BP_ALL | GO:0008283 cell proliferation                                     | 8     | 2.730375427 | 0.054304203 | 1343327, 95794, 1  | 196        | 247      | 14219     | 2.349665372     | 0.999999999 | 0.807394786 | 60.00688477 |
| GOTERM_BP_ALL | GO:0006950 response to stress                                     | 24    | 8.19112628  | 0.056347116 | 99852, 88225, 134  | 196        | 1184     | 14219     | 1.470525372     | 0.999999999 | 0.812589225 | 61.40158774 |
| GOTERM_BP_ALL | GO:0044057 regulation of system process                           | 7     | 2.389076498 | 0.05890011  | 1343327, 108077, 1 | 196        | 201      | 14219     | 2.534474769     | 0.999999999 | 0.81971133  | 63.01954053 |
| GOTERM_BP_ALL | GO:0051989 regulation of transmission of nerve impulse            | 5     | 1.706484642 | 0.059629192 | 1343327, 108077, 1 | 196        | 107      | 14219     | 3.389996185     | 0.999999999 | 0.817799477 | 63.54702889 |
| GOTERM_BP_ALL | GO:0048523 negative regulation of cellular process                | 24    | 8.19112628  | 0.059858746 | 95411, 1341171, 2  | 196        | 1192     | 14219     | 1.406656075     | 0.999999999 | 0.812733102 | 63.69221451 |
| GOTERM_BP_ALL | GO:0044619 negative regulation of biological process              | 26    | 8.873720137 | 0.063420401 | 1276109, 1341163   | 196        | 1226     | 14219     | 1.422468988     | 0.999999999 | 0.820694445 | 65.88577389 |
| GOTERM_BP_ALL | GO:0002783 regulation of developmental process                    | 5     | 1.706484642 | 0.06478582  | 96612, 1353627, 9  | 196        | 110      | 14219     | 3.227541744     | 0.999999999 | 0.825344591 | 66.63053461 |
| GOTERM_BP_ALL | GO:0006996 organelle organization                                 | 22    | 7.508532423 | 0.06502237  | 138453, 1341163    | 196        | 1078     | 14219     | 1.480528946     | 0.999999999 | 0.821186193 | 66.83010558 |
| GOTERM_BP_ALL | GO:0006811 ion transport                                          | 16    | 5.460750853 | 0.065315872 | 1858231, 1351872   | 196        | 712      | 14219     | 1.630245357     | 0.999999999 | 0.816844907 | 67.00150772 |
| GOTERM_BP_ALL | GO:0031644 regulation of neurological system process              | 5     | 1.706484642 | 0.06946919  | 1343327, 108077, 1 | 196        | 113      | 14219     | 2.309963688     | 0.999999999 | 0.832899957 | 69.58505771 |
| GOTERM_BP_ALL | GO:0007017 microtubule-based process                              | 7     | 2.389076498 | 0.070742881 | 1917176, 1341163   | 196        | 211      | 14219     | 2.409376628     | 0.999999999 | 0.831007716 | 70.09336843 |
| GOTERM_BP_ALL | GO:0007254_JNK cascade                                            | 3     | 1.023890785 | 0.070970193 | 1346863, 1341850   | 196        | 32       | 14219     | 6.801179847     | 0.999999999 | 0.828666991 | 70.12969111 |
| GOTERM_BP_ALL | GO:0019233 sensory perception of pain                             | 3     | 1.023890785 | 0.074888199 | 106185, 1344351, 1 | 196        | 33       | 14219     | 6.590583488     | 0.999999999 | 0.838169139 | 72.13153544 |
| GOTERM_BP_ALL | GO:0007156 homophilic cell adhesion                               | 5     | 1.706484642 | 0.077302391 | 189010, 108077, 1  | 196        | 117      | 14219     | 3.100252922     | 0.999999999 | 0.842831288 | 73.30154997 |
| GOTERM_BP_ALL | GO:0032501 multicellular organismal process                       | 70    | 23.89076498 | 0.07756269  | 95794, 2684993, 1  | 196        | 4229     | 14219     | 1.17306873      | 0.999999999 | 0.838396442 | 73.42493666 |
| GOTERM_BP_ALL | GO:0007049 cell cycle                                             | 14    | 4.778156997 | 0.077830319 | 138453, 1343463    | 196        | 611      | 14219     | 1.682263269     | 0.999999999 | 0.835113388 | 73.55118246 |
| GOTERM_BP_ALL | GO:0009566 fertilization                                          | 4     | 1.365187713 | 0.07853726  |                    |            |          |           |                 |             |             |             |
