# Supplementary material for: A novel disease-modifying osteoarthritis drug candidate targeting Runx1
Source: HighWire-hosted journal article supplement (doi:10.1136/annrheumdis-2012-201745), 2012-10-06
Supplement: annrheumdis-2012-201745supp_legends.pdf [file annrheumdis-2012-201745supp_legends.pdf]

## Supplementary Figure Legends

**Supplementary Figure 1.** Schematic of the four steps employed to screen for chondrogenic agents among 2,500 natural and synthetic small compounds. The first and last screenings used the Col2GFP-ATDC5 system. The second and third screenings used toluidine blue staining and *Col2a1* mRNA level measurements by real-time RT-PCR, respectively.

**Supplementary Figure 2.** (A) Temporal profile of the *COL2A1* promoter activity in Col2GFP-ATDC5 cells transfected with the luciferase reporter gene under the treatment with insulin (10  $\mu\text{g/ml}$ ), TD-198946 ( $10^{-6}$  M), or the control vehicle. (B) Temporal profile of cell proliferation determined by the WST-8 assay in C310T1/2 cells treated with TD-198946 ( $10^{-9}$  and  $10^{-6}$  M) or the control vehicle. All data are expressed as the mean  $\pm$  s.d. (error bars) for 4 wells/group.

**Supplementary Figure 3.** Effect of TD-198946 on the transcriptional activities of BMP, TGF- $\beta$ , and the canonical Wnt signalling pathway. Luciferase assays were performed using reporter plasmids containing the BMP responsive element (12XGCCG), TGF- $\beta$  responsive element (9XCAGA), and the canonical Wnt signal responsive element (Top flash) in C3H10T1/2 cells treated with TD-198946 ( $10^{-7}$  M), BMP2 (100 ng/ml), TGF- $\beta$ 1 (1 ng/ml), or transfected with the plasmid expressing constitutively active TCF (T-cell factor) (TCF-CA). Data are expressed as the mean (bars)  $\pm$  s.d. (error bars) for 4 wells/group.

**Supplementary Figure 4.**

Safranin-O stained sections of mouse medial tibial cartilage obtained from normal mouse knee joint of 8-week-old male mice, which were given a 10 µl intra-articular injection of TD-198946 (100 nM) every 5 days for 8 weeks. Scale bars, 100 µm.

**Supplementary Figure 5.** Identification of target transcriptional factors of TD-198946 for chondrogenesis. (A) Scheme of the screening steps for target factors by a microarray analysis of C3H10T1/2 cells treated with TD-198946 ( $10^{-7}$  M) or the control vehicle for 2 days. Genes that showed more than a 10-fold upregulation by TD-198946 were analysed by Gene Ontology. Among genes associated with the most over-represented term, ‘Multicellular organismal development,’ transcription-related genes were further selected by the GO term. (B) Gene ontology analysis of genes that showed more than 10-fold upregulation by TD-198946. 196 genes were analysed by the Gene Ontology (GO) biological process. The top 20 over-represented terms are shown. The x axis corresponds to *P*-values (logarithmic scale). (C) Six transcription-related genes associated with the Gene Ontology (GO) term, multicellular organismal development, among 196 genes that showed more than 10-fold upregulation by TD-198946.

**Supplementary Figure 6.**

Effects of TD-198946 treatment on Sox5, Mmp-13 and Col1a1 expression in OA.

Immunostainings of Sox5, Mmp-13 and Col1a1 from the inset box of figure (Figure 4A). Scale bar, 50 µm.

**Supplementary Figure 7.**

Safranin-O staining and immunostaining of Sox5 in normal and OA regions of tibial cartilage obtained from a total knee arthroplasty patient. Scale bar, 50  $\mu$ m.

**Supplementary Figure 8.** Redifferentiating effects of TD-198946 on human articular chondrocytes that had been dedifferentiated by passaging 3 times (P3). *COL2A1* mRNA levels determined by real-time RT-PCR analysis and toluidine blue staining are shown as chondrogenic markers. dedifferentiated human articular chondrocytes were cultured with TD-198946 ( $10^{-9}$  and  $10^{-6}$  M) or the control vehicle in DMEM for 7 days. Data are expressed as the mean (bars)  $\pm$  s.d. (error bars) for 4 wells/group, and representative figures are shown.

**Supplementary Figure 9.**

Redifferentiating effects of TD-198946 on human OA articular chondrocytes that had been induced to degenerated chondrocytes by interleukin-1 $\beta$  (IL-1 $\beta$ ). *COL2A1* and *COL10A1* mRNA levels determined by real-time RT-PCR analysis. Degenerated human articular chondrocytes were cultured with TD-198946 or the control vehicle under interleukin-1 $\beta$  treatment (10 ng/ml) in serum-free media for 7 days. Data are expressed as the mean (bars)  $\pm$  s.d. (error bars) for 4 wells/group, and representative figures are shown.

\* $P < 0.01$  vs. the control vehicle under interleukin-1 $\beta$  treatment group

**Supplementary Figure 10.**

(A) Runx1 protein level determined by immunoblotting using an antibody to Runx1 and actin in lysates of primary mouse chondrocytes from *Runx1*-floxed (*Runx1<sup>fl/fl</sup>*) cells that were adenovirally infected with GFP or Cre.

(B) *Sox5* and *Sox6* mRNA levels in primary mouse chondrocytes from *Runx1*<sup>fl/fl</sup> mice cultured with TD-198946 ( $10^{-7}$  M) or vehicle for 5 days after adenoviral (Ax) infection with GFP or Cre.

\* $P < 0.01$  vs. Ax-GFP and TD treatment group.
